# Supplementary material
Source: publisher site journal article supplement (https://www.dovepress.com/article/272259)
Supplement: Supplementary file 1 [file get_supplementary_file.php]

**Supplementary file**

***Example search strategy***

Before running searches, the databases’ standardised subject terms were checked for updated terms since the last search/review.

**Medline via Ovid: searched 28th May 2020**

Ovid MEDLINE® and Epub Ahead of Print, In-Process & Other Non-Indexed Citations, Daily and Versions® 1946 to May 27, 2020

| **#** | **Searches** |
| --- | --- |
| 1 | (cigar* or smok* or tobacco).ab,ti,kw. |
| 2 | "Smoking Cessation"/ or "Smoking Prevention"/ or Smoking/ or "Tobacco Industry"/ or "Tobacco Products"/ or exp "Tobacco Smoking"/ or "Tobacco Use Cessation"/ |
| 3 | 1 or 2 |
| 4 | ((brand* or (colo?r adj1 schem*) or descriptor? or design? or graphic? or image? or imagery or logo? or trademark? or trade-mark?) adj3 (ban? or banned or banning or outlaw* or prohibit* or remov* or restrict* or without)).ab,ti,kw. |
| 5 | (("drab brown" or "drab green" or dissuasiv* or generic* or homogen?ous or neutral* or "olive green" or plain or standard* or unbranded or uniform*) adj3 (can? or canister? or carton? or container? or hardpack? or pack* or pouch or pouches or softpack? or tin?)).ab,ti,kw. |
| 6 | product packaging/ or product labeling/ |
| 7 | 4 or 5 or 6 |
| 8 | exp United Kingdom/ |
| 9 | (britain or british or england or english or gb or "G.B." or "GB." or "G.B" or ireland or irish or scotland or scottish or wales or welsh or "united king*" or uk or "U.K." or "UK." or "U.K").ab,gi,in,ti. |
| 10 | (nhs or "national health service").ab,gi,in,ti. |
| 11 | 8 or 9 or 10 |
| 12 | 3 and 7 and 11 |
| 13 | limit 12 to yr="2019-Current" |
| 14 | limit 12 to ed=20180801-20201231 |
| 15 | limit 12 to ep=20180801-20201231 |
| 16 | limit 12 to dt=20180801-20201231 |
| 17 | limit 12 to ez=20180801-20201231 |
| 18 | 13 or 14 or 15 or 16 or 17 |
| Fields: ab = abstract, kw = keywords, ti = title, in = institution, gi = grant information (displays information about awarded grants, may contain Grant Number (NO), Grant Acronym (GR), Grant Organization (GO) and Grant Country (GC)), ed = entry date, ep = electronic date of publication, dt = create date [phrase indexed], ez = entry date [phrase indexed], yr = year of publication. | |
